# Supplementary material for: The m6A reader YTHDF1 regulates axon guidance through translational control of Robo3.1 expression
Source: PubMed Central journal article supplement — Nucleic Acids Res. 2019 Mar 7;47(9):4765–77. doi: 10.1093/nar/gkz157 (PMC6511866; doi:10.1093/nar/gkz157), 2019-03-07

## SUPPLEMENTARY MATERIAL

### The m<sup>6</sup>A reader YTHDF1 regulates axon guidance through translational control of Robo3.1 expression

Mengru Zhuang<sup>1,2</sup>, Xinbei Li<sup>1</sup>, Junda Zhu<sup>1</sup>, Jian Zhang<sup>1</sup>, Fugui Niu<sup>1,3</sup>, Fanghao Liang<sup>1,3</sup>, Mengxian Chen<sup>1</sup>, Duo Li<sup>1</sup>, Peng Han<sup>1</sup>, and Sheng-Jian Ji<sup>1,4,\*</sup>

**Supplementary Figure S1.** Labeling of commissural axons with GFP. **(A)** Cross section of spinal cord of *Atoh1-Cre<sup>+/-</sup>;Rosa26<sup>mT/mG</sup>* embryo at E11.5 showed GFP labelling in dorsal commissural neurons (DCN) and commissural axons (CA). **(B)** Co-immunostaining of GFP (green) and Robo3.1 (red) in cross section of ventral spinal cord of *Atoh1-Cre<sup>+/-</sup>;Rosa26<sup>mT/mG</sup>* embryo at E11.5. Robo3.1 was expressed in pre-crossing and crossing commissural axons (yellow arrows) and was absent from post-crossing axons (green arrowheads). **(C)** Immunostaining of E11.5 spinal cord sections with two Robo3.1 antibodies (gt, goat polyclonal; rt, rabbit polyclonal from Marc Tessier-Lavigne lab) showing identical patterns. **(D and E)** RT-qPCR demonstrated that application of FP-CM, CHX or MG-132 to cultured DCN explants did not change *Robo3.1* mRNA levels. Quantification of RT-qPCR is represented as dot plots ( $n = 3$  replicates): ns, not significant; for D,  $P = 0.23$  (Ctrl vs FP-CM),  $P = 0.13$  (Ctrl vs CHX), by one-way analysis of variance (ANOVA) followed by Tukey's multiple comparison test; for E,  $P = 0.34$  (Vehicle vs MG-132), by unpaired Student's  $t$  test. Scale bars, 100  $\mu\text{m}$  (A) and 50  $\mu\text{m}$  (B and C).

**Supplementary Figure S2.** *Robo3.1* mRNA is predicted to be modified by m<sup>6</sup>A and loss of function of m<sup>6</sup>A writer METTL3 does not change *Robo3.1* mRNA levels. **(A)** All predicted m<sup>6</sup>A sites in full length of *Robo3.1* mRNA with SRAMP. High Confidence m<sup>6</sup>A sites were mutated in this work. **(B)** *Robo3.1* mRNA was not changed in neurons treated with *shMettl3*, compared with *shCtrl*. Quantification of RT-qPCR is represented as dot plots ( $n = 3$  replicates): ns, not significant ( $P = 0.25$ ); by unpaired Student's  $t$  test. **(C)** Similar YTHDF1 proteins levels were detected in input samples, and also RIP using YTHDF1 antibody

pulled down similar YTHDF1 protein from COS-7 cells co-expressing YTHDF1 and *Robo3.1* with m<sup>6</sup>A sites mutated (*MT<sup>m6A</sup>*) compared with *WT Robo3.1*.

**Supplementary Figure S3.** YTHDF1 does not change *Robo3.1* mRNA levels and YTHDF2 does not regulate translation of *Robo3.1*. **(A and D)** RT-qPCR analysis showed that YTHDF1 could not change *Robo3.1* mRNA levels in cells co-expressing *Robo3.1* and YTHDF1 under different conditions as indicated. Quantification of RT-qPCR is represented as dot plots ( $n = 3$  replicates): ns, not significant; for A,  $P = 0.12$  ("*Robo3.1-WT + IRES-eGFP*" vs "*Robo3.1-WT + Ythdf1-IRES-eGFP*"),  $P = 0.13$  ("*Robo3.1-WT + IRES-eGFP*" vs "*Robo3.1-MT<sup>m6A</sup> + Ythdf1-IRES-eGFP*"),  $P = 0.95$  ("*Robo3.1-WT + Ythdf1-IRES-eGFP*" vs "*Robo3.1-MT<sup>m6A</sup> + Ythdf1-IRES-eGFP*"); for D,  $P = 0.66$  ("*HA-Robo3.1*" vs "*HA-Robo3.1 + CHX*"),  $P = 0.71$  ("*HA-Robo3.1*" vs "*HA-Robo3.1 + YTHDF1*"),  $P = 0.37$  ("*HA-Robo3.1 + YTHDF1*" vs "*HA-Robo3.1 + YTHDF1 + CHX*"); by one-way analysis of variance (ANOVA) followed by Tukey's multiple comparison test. **(B)** YTHDF2 could not change *Robo3.1* protein level. Co-expression of *WT Robo3.1* with YTHDF2 in COS-7 cells did not lead to significant changes of *Robo3.1* protein level by IF, compared with the control. Scale bar, 25  $\mu\text{m}$ . **(C)** Quantification of relative *Robo3.1* IF to eGFP in **(B)**. Data of IF quantification **(C)** are represented as box and whisker plots: "*Robo3.1-WT + IRES-eGFP*" ( $n = 24$  cells) vs "*Robo3.1-WT + Ythdf2-IRES-eGFP*" ( $n = 36$  cells), ns, not significant ( $P = 0.09$ ); by unpaired Student's  $t$  test.

**Supplementary Figure S4.** YTHDF1 expression in DSC drops from pre-crossing to post-crossing stages. **(A and B)** Knockdown or overexpression of YTHDF1 did not change *Robo3.1* mRNA levels in commissural neurons. RT-qPCR analysis showed that *Robo3.1* mRNA levels were not affected after YTHDF1 was knocked down **(A)** or overexpressed **(B)** in commissural neurons. **(C)** YTHDF1 protein levels in DCN were decreasing from embryonic stage E10.5 to E12.5. Total Protein was extracted from mouse embryonic dorsal spinal cord of different stages with RIPA buffer, followed by anti YTHDF1 Western Blotting. As

shown, YTHDF1 protein was continuously decreasing from E10.5 to E11.5, and to E12.5. (D)

Quantification of WB results in (C). Quantification of RT-qPCR and WB is represented as dot plots ( $n = 3$  replicates): ns, not significant; for A,  $P = 0.99$  (*shYThdf1-2 vs shCtrl*),  $P = 0.43$  (*shYThdf1-3 vs shCtrl*), by one-way analysis of variance (ANOVA) followed by Tukey's multiple comparison test; for B,  $P = 0.62$ , by unpaired Student's  $t$  test; for D, \*\*\*\* $P = 3.65E-5$  (E10.5 vs E11.5), \*\* $P = 0.0016$  (E11.5 vs E12.5), by one-way analysis of variance (ANOVA) followed by Tukey's multiple comparison test.

**Supplementary Figure S5. *Ythdf1* cKO does not change *Robo3.1* mRNA levels, patterning of spinal cord,**

**or commissural neuron development. (A)** RT-qPCR analysis showing that *Robo3.1* mRNA level was not altered in *Ythdf1* cKO embryos. Quantification of RT-qPCR is represented as dot plots ( $n = 3$  replicates):

ns, not significant;  $P = 0.09$ ; by unpaired Student's  $t$  test. (B) *Isl1/2* immunostaining in E11.5 spinal cord

indicated that *Ythdf1* cKO does not disturb neural patterning in neural tube development. (C-E)

Quantification of *Isl1/2*<sup>+</sup> spinal neuron subtypes in (B). (F-I) Development of dI1 commissural neurons

marked by *Lhx9* (F-representative images, G-quantification) and *Lhx2* (H-representative images, I-

quantification) is not affected in *Ythdf1* cKO. All data are mean  $\pm$  s.e.m. and represented as box and

whisker plots: *Ythdf1*<sup>fl/fl</sup> ( $n = 10$  sections in C-E;  $n = 15$  sections in G;  $n = 12$  sections in I) vs *Atoh1-Cre*<sup>+/-</sup>

; *Ythdf1*<sup>fl/fl</sup> ( $n = 11$  sections in C-E;  $n = 15$  sections in G;  $n = 9$  sections in I); ns, not significant ( $P = 0.65$  for

*Isl1/2*<sup>+</sup> motor neurons in C;  $P = 0.20$  for *Isl1/2*<sup>+</sup> preganglionic column neurons in D;  $P = 0.97$  for *Isl1/2*<sup>+</sup> dI3

neurons in E;  $P = 0.47$  for *Lhx9*<sup>+</sup> neurons in G;  $P = 0.13$  for *Lhx2*<sup>+</sup> neurons in I); by unpaired Student's  $t$  test.

Scale bars, 100  $\mu$ m (B, F and H).

**Supplementary Figure S6. m<sup>6</sup>A modification level changes, but not another m<sup>6</sup>A reader YTHDF3,**

contribute to translational regulation of *Robo3.1*. (A) The m<sup>6</sup>A levels of *Robo3.1* mRNA were decreased

after stage E10.5. Total RNA was extracted from E10.5 (8 embryos), E11.5 (8 embryos) and E12.5 (7

embryos) mouse embryonic spinal cord, followed by anti m<sup>6</sup>A IP. RT-qPCR analysis of RNA elutes showed dramatic decreases of m<sup>6</sup>A levels from E10.5, E11.5 to E12.5. Quantification of RT-qPCR is represented as dot plots ( $n = 3$  replicates): \*\*\*\* $P = 1.52E-5$  (E10.5 vs E11.5), \*\*\*\* $P = 3.52E-6$  (E10.5 vs E12.5), by one-way analysis of variance (ANOVA) followed by Tukey's multiple comparison test. **(B-E)** Loss of function of YTHDF3 did not significantly change *Robo3.1* mRNA or proteins levels. **(B)** Western Blotting confirmed that *shYthdf3* could efficiently knock down YTHDF3 in DSC neurons. **(C)** Robo3.1 Immunofluorescence in commissural axons showed no change after *shYthdf3* infection of commissural neurons which are marked by eGFP. Scale bar, 10  $\mu\text{m}$ . **(D)** Quantification of Robo3.1 IF in (C). All data are mean  $\pm$  s.e.m. and represented as box and whisker plots: ns, not significant;  $P = 0.053$ ; by unpaired Student's  $t$  test. **(E)** RT-qPCR analysis showed that knockdown of YTHDF3 in commissural neurons did not change *Robo3.1* mRNA levels. Quantification of RT-qPCR is represented as dot plots ( $n = 3$  replicates): ns, not significant;  $P = 0.70$ ; by unpaired Student's  $t$  test.

# Supplementary Figure S1

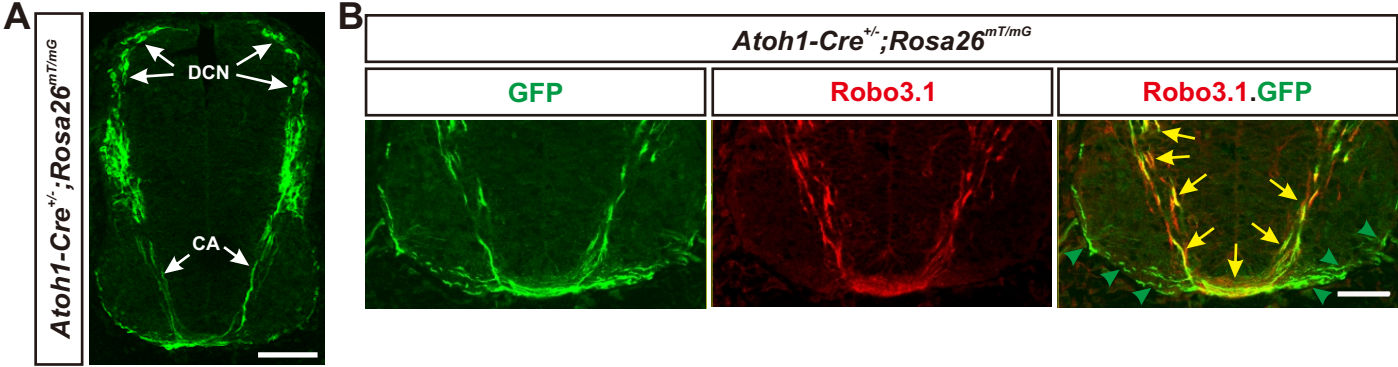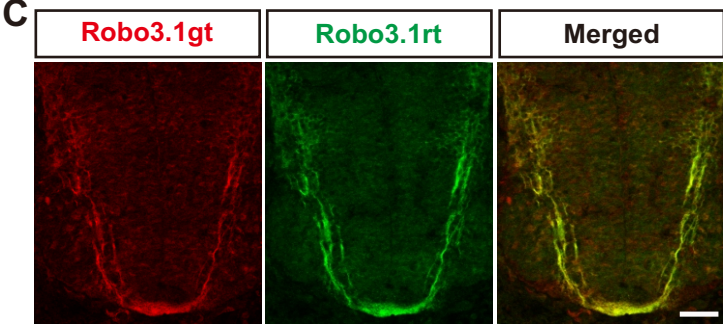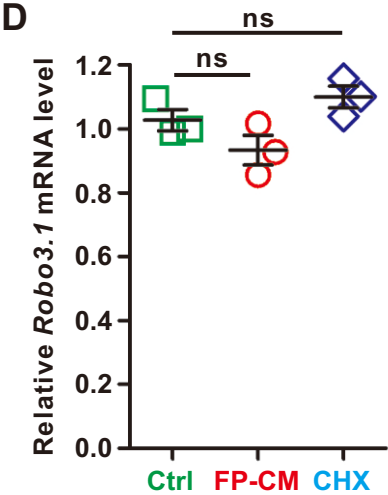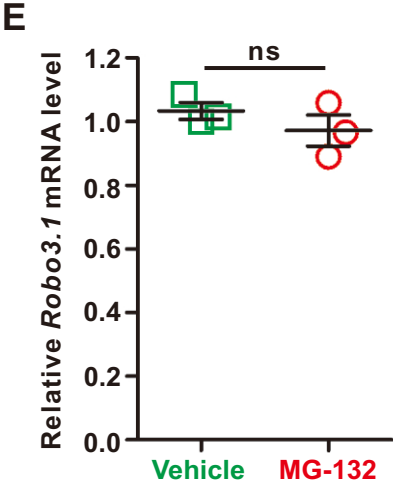

# Supplementary Figure S2

**A** GAGGACAGCCCGCGCAGAGGCACGGCCGGUACCCAGGCACGCCUGCAGGACAGCGGCAUCGUGGCUGCCGCGCAGCGCGCAAAGGCUGUGGAGGGGCUUACGGCCUCCGGC  
 CCGGGGCUCCAGACCCAAAGGGCUGGGCUCGAGGCCCCUGCCCAAGACCCAGCGGGCUGCGCUAUGCUGCGCUACCUUGCUUAAAACACUACAGAU**GA**CUUUGUUC  
 GCGGACUCCCGGCGAGGACAUCCUACUCCAGCGAGCUACUCUUGGGUUAACUCCUGGCUUGCGAGCGCUCACCCUAGUUCUGUUCUCCUGGAGAUCCUCCUUCU  
 CAUUGGGUCAAGAGUUGGGCCAGAAGUCCAUUGCCAGCGAUUGCGGAGCAGCCGCCAGAUUGUGGUUUCCAGGGGCGAGCGCGCUACUCUGCCUUGCGGAGCAGAA  
 GGCCGGCCUCGACCCAAUCGAGUGGUACAAGAAUGGGGCGGUGUGGCGACUGCACGGGAGGAUCCGCGUGUCACCGUCUGCUGUCCAGCGGGCGCCUUCUUCU  
 UUCGCCGCAUUGUGCAGGGCGUCGUCUGGAGGAGGAGGUGUCUACCCUGUGGCGCAGCAUCCUGGGAGCAGCGGCUAGCAGAAACGCCUUCUGGAAAGUA  
 GCGUUCUCCGUGAUGAUUUCGGCAUUGCCUGGAAACGUGGUGGUAAGCGGUGGUAAGCGGUGGGGAGCCAGCUCUUAUGGAAUGUGUGCCCCUAAAGGGUACCCAGGCUUUGG  
 UGACCCUGGAAAGGCAAAUAAAGCUUAAAGGAAGAGGAGGGAAGGAUACCAUACUGGAGGAAAGCUGAUUGAUGACACACGUAUAAAGAGUAGUUGCGCAUGUAU  
 UGUGCGUAGCCUCCAAUCUGGAGGAGAACGAGAGAGUGGGGACGUAACCUUGGUAUCUGGAGGCGUCCUCAAUUCUGGUAAGACCAAUAAACCCAGGUAUGGCUUGGCU  
 GAUGCCUUGUGAAUUCUGUGAGGUGCAGGGAGAUCCCGAGCCAAUCUACUUGGCGCAAGGAUGAUGGGGAGCUGCCCGCGGGCAGGUAUGAGAUUCGGAGUG  
 ACCCAGCCUUUGGAGUCCAGCAAGUAGCUCUGAAGACGAGGGGACGUAACGUGUGUAGCAGAGAACAGUUGGGCCCGCAGAGGCAUUGGCUCCUCCAGUUGUCCAC  
 GUCCACCAAAUUGUGAUAAGCCCGAGAACGACAGUAGCUCUCCGAGGAACGUGUCAUUCUAAUGAGACCAAAGGAAACCCUCCACUUGCCAUUCUGGCGAG  
 AAGGAAGGGAGUAGUCUUGCCUAGUCAGUCACUCCAAACCUUGGGAGCCUUCUAGUCUCCAAAGAGGCGCAACUACUAGCUGAAAGUAAGUAGCGGGAU  
 GUGGCUACUACUGUGCCAGGCGUGCAGUGUGGCUUGAUGCAUCCUAGCAAAGGCCUUAUUAAGAGAUAAAAGGGCCUCCAUAGAUGGGCUACCCCAUUCUCCCA  
 GGGACAGCCAUACAGACACUGGUACUUGGCUUCUGUGGCGCAUGCAGAGUAGUUGGAAACCCCGAGCCCAACAUCCAGUGGAAAGAAAGGAUGAGAGGUGGCGUC  
 AGGGGAGUACUACAGUUAACUUAU**GGACA**AUGGCACUCUACACAUUGCCAGCAUACAGGAGAU**GGACA**UUGGUUUUCUACAGCUGUGUGGCCUCCAGUUCUAGU  
 GAGGCCCAUUGAAUAGCUGGCUUAGGAAGCAAGAAAGAUUUGGGGACAUACCCAGGUCCAGCAACAGGACCCAGUAAUCCUCCAGGGCCUCCUUCAGCCAAUAGUCACA  
 GAGUAAACCGCAACCAUUAACUUGACCUUGAAGCCCAUCCACAGUCUGGGCCACAGCUACCUCCUUAUGUGAUAAGGCCUUCAGCCAAAGCAGCUGGCCAACACGUGG  
 CGGACGGGCGGCGAUGGGGUGCAGUCUGAAACUUAACCAUACAGUGGCGUCAGCCCAACACCAUUAUUAUCCUAGUGAGAGCAGUUGGAGCCUUGGGCCUUCAGUGA  
 ACCCAGUCUGUCUAGAGCCUUAACCCAGGACAGCAACCUUAUAGCCAGCCGAGGAGCCGUGGAAAGGCCAGCGAGGGCUAGCGGAAAGUGGCGGUGCGAAUUGC  
 AGGAGCCACUUGCCUUGGGCCAGAACUCUGCAGGUUUCU**GGACU**UGGGAUGGUCCAGUCCAGCUGGUGCAAGGAUUCUGUGUUCUGGAGGAAUUGCAGGCGUUGA  
 CCAGGAAAGCU**GGACA**AUUGCUAGACCUACAGAUCCACAGUCCACAAAGUAUCUGUCAAGAG**GGACU**GCCCCAGGGGCCAAAUCCAGAUCAAGGUGCAAGUCCAAAGCCA  
 GGAGGGGCGUGGGGCGAAAGCCUUUUGUGACCAGGAGCAUUCUGAGGAGGCCCCAGUGGCCCCUCCAGGGAGUGGCGUGGCUUGGGGGUGAUCGCAACAGC  
 AGUGUCAUGUUCUGGGAGCCUCCACUUCUCCAGGCAUUGGGGUAUCACUGAAUACCCAGAUUUGGUGCCUGGUAUUAAGCCGAAUUCACCUCUAAUUGAUGU  
 GCAGCAGUUGGGCAGCUCUGAGCUUACGGGACUGCUACCCAGGCAUCCAGCCAGAUUAUCGAGCCUUGGUGGCAAGCAGCUACACAGUCCUGGGCGUGGCCAGUGCUC  
 CAGUGCUAGUGCAGCUGCCAUUCUCCUGGGGCGGAGCCGGGCGGAGCCGCGGCGUAGGUCAGCGAGGGGCGUGGCAAGCGUUGGUAAGGUGUCGCGGAAGCCUUCUUCUACG  
 UGGCAGCAGCCAGCCUUGGGGCGCUGCUCUACUGGGUUCUGGCGCCGCUUACCGGCGUCAGAAGCAGCGCAAA**GAACU**CAGUCACUUAAGCCGCUUCUUGCCUACA  
 CACCUGCAGUUCUUCACACUCAGAGGGCCUUCUGGUAUCCAGUUCAGGCCACCCAUUGGGCCUUGGCCUUCGCUUACCAUGGCGUGGAGACUCCUGGCCCCAC  
 CCACCUCGGAGUCCUACAGCUCAGGAGCCCGGGGAGCUGUCGCCAGCAUUCUAGUCCAGAUAGAUAGAUACUAAUAGGCGAGGAAUUCUCCUUAUUCUUGGCU**GA**  
**ACU**UGCAGUGGUGCUAAUUGCCUUGGAGGGUCCUGUCACAGCACAUAGCCAGUAGGGGAAAGCUCACAGACCUCCAGGGAGGCUCCUACACACUUCUUCUG  
 GGGACCAAGCACCUGGAGCCAGUAUGCUCUCCCGGAAUGAGCGGG**GGACA**UGGAGCGAGCCAGGGGAGCCUUCUGGGCAAGCCUUCUAGUACAAUUGCCAUUCU  
 UUGAGCUGCCAGAAAGCCUGCCACCGCCUCCUUCUUGGAGCUGAGCUGUCCGAGGGGCCUUCAGGAGGAGCUGAAGGGCAGUUCAGAUUCUGAAGAGUGGUGCC  
 CACCAGUGCCUGAGAAAGCCACUUGGUUGGUAAGCUCUCCAGUGGUGGUGGUGGUCUCCAGCCCAAGGGACACACCCUCCCCACUUCUUCUUAUGGACAGCAGCA  
 UCCACAGCUACUUCUACCCUCCUCCUUGAUCCUCCCAACCCUACUCCCAUUCUCCUAGAUCCAGAGUCCAGAGAGUACCCUCCGGGCGAAUUCUCCUUC  
 AGCGUAUCCCAAGCCCGCUCUGAGUAGCAUACGGAGCGCCUGUUGGCCUUGGGUGUGGCCCGUACUCUCCUUAUCACGCUAGCCCCAGUCCUUGCCUAGUACAGCCAG  
 CAGUGCACCGGGGAGAACCCGUCAGGUAAUCUGGAGAGAGAUACUCCCAUCCUAGGACACCGUCUCGAAUCCGGAAAGAAACCCAAAGCCUUCUCCUACAGAAAGGGAGCA  
 CAGUCCCG**GGACU**UGCCCCACCCUUGCCACCACAGAGGAAGAGACAAGCUGGCCUUGGGUUCGCGGGCAGCAGGCGAGCAUUCUCCUAGAGCGAGAGCGCA  
 GUGGGGAGAGGAGUGGUGCAGGCGAGUGCCUUAAGGGGCCAAACCUUAGGGGCCAACAGUUGGGCCCAACCCAGAUCCUUCUCCUCCAGAUCCUUCUCCUAGUUG  
 UGACUCACUGAAGCACACUGUCUACAACAGUUUUAUGUUGUUCUGGAAUCAGAG**ACU**AGCUCUUUACUUCUCCAUUCUGGUUC**UGACU**GAGACAUUUUGUACAAAAGGAGA  
 AAGAAAAGGCCUCCGACUCUGAGCCUUGGUCUUGUUUUGGCAUGUUGUAAGUAGGAGCGGCUAUGAAGGUUCUAAAGGCUAAUACACGCGUGGUAAGCUUCU

**AUG:** Start codon  
**UGA:** Stop codon  
**GGACA:** predicted High Confidence m<sup>A</sup> site, which are mutated in this work  
**GAACU:** predicted Moderate or Low confidence m<sup>A</sup> site

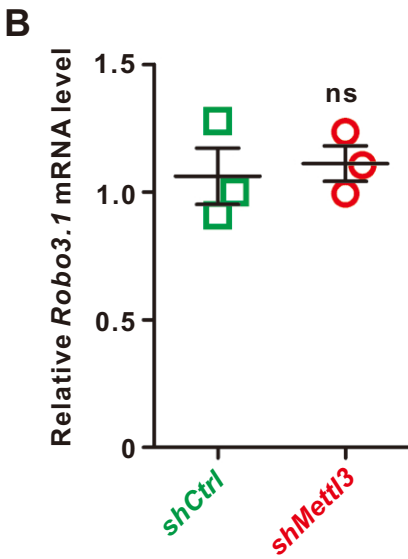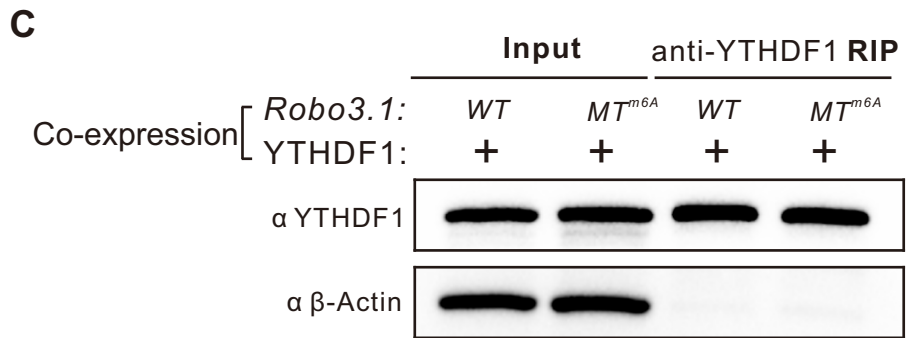

# Supplementary Figure S3

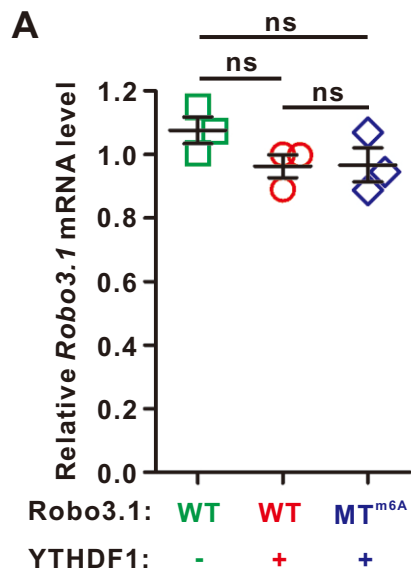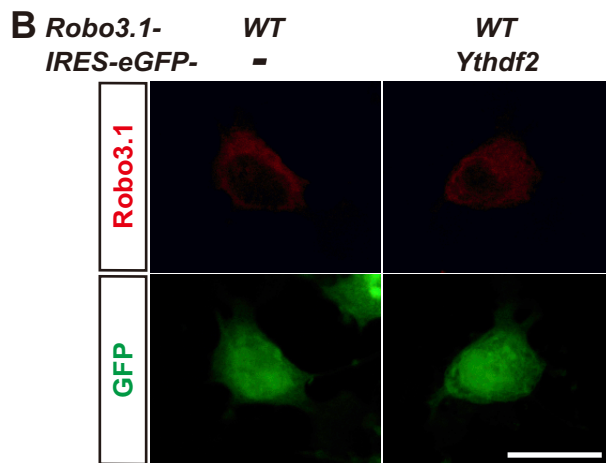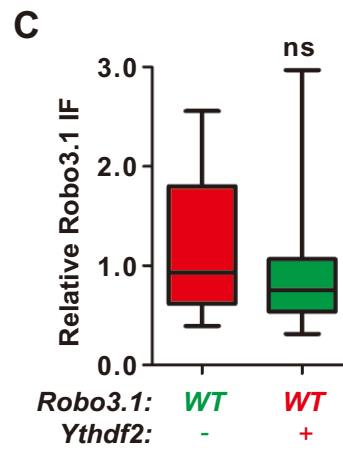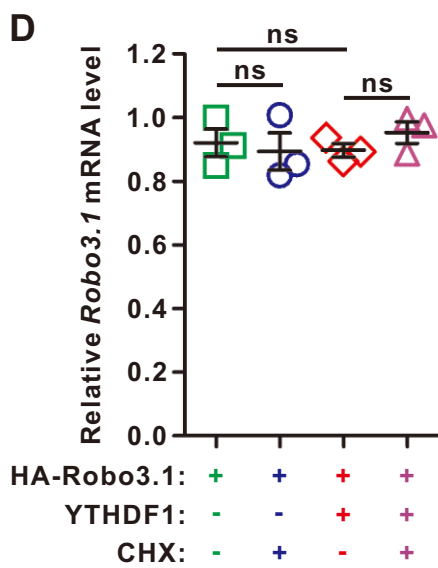

# Supplementary Figure S4

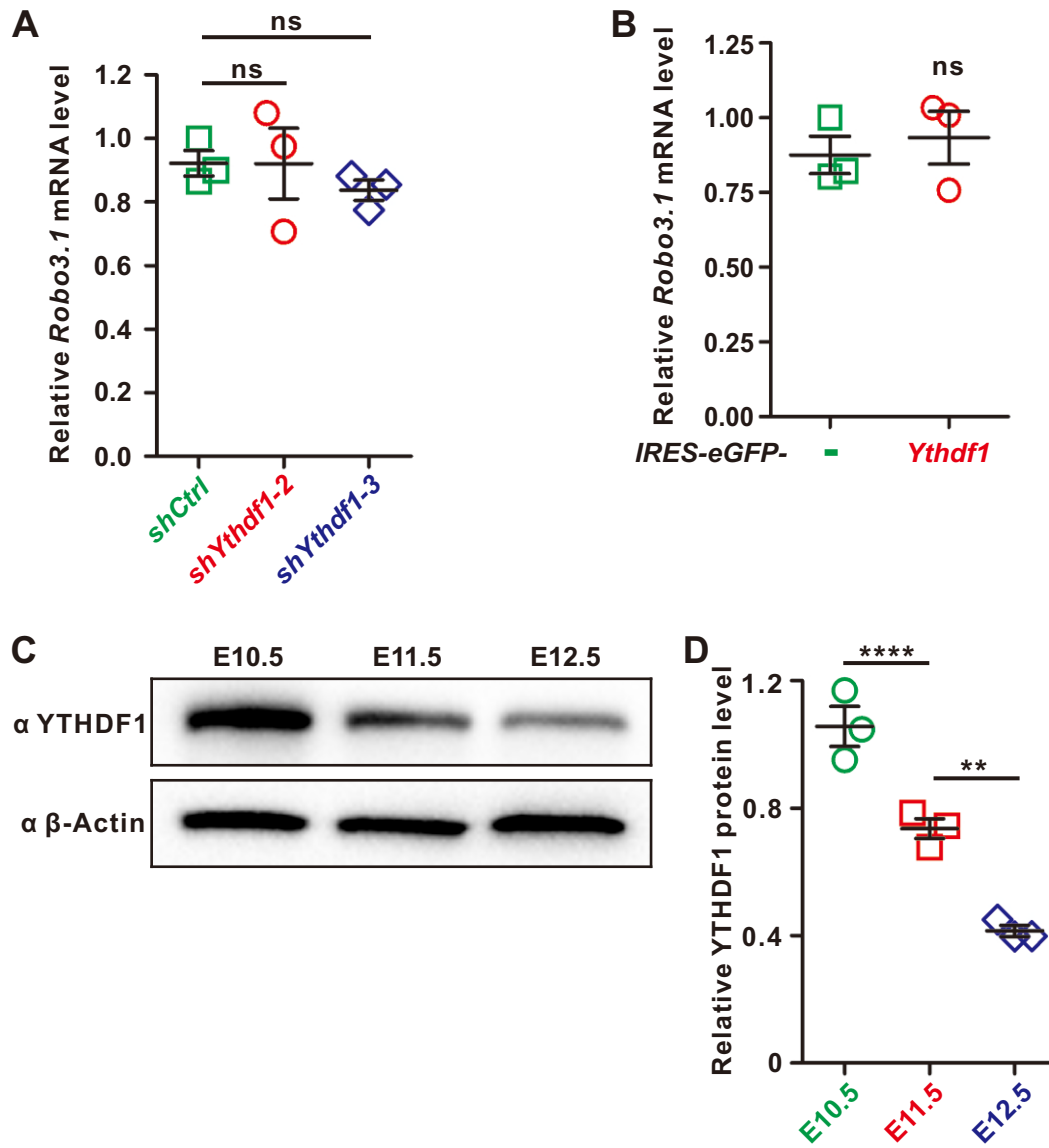



# Supplementary Figure S5

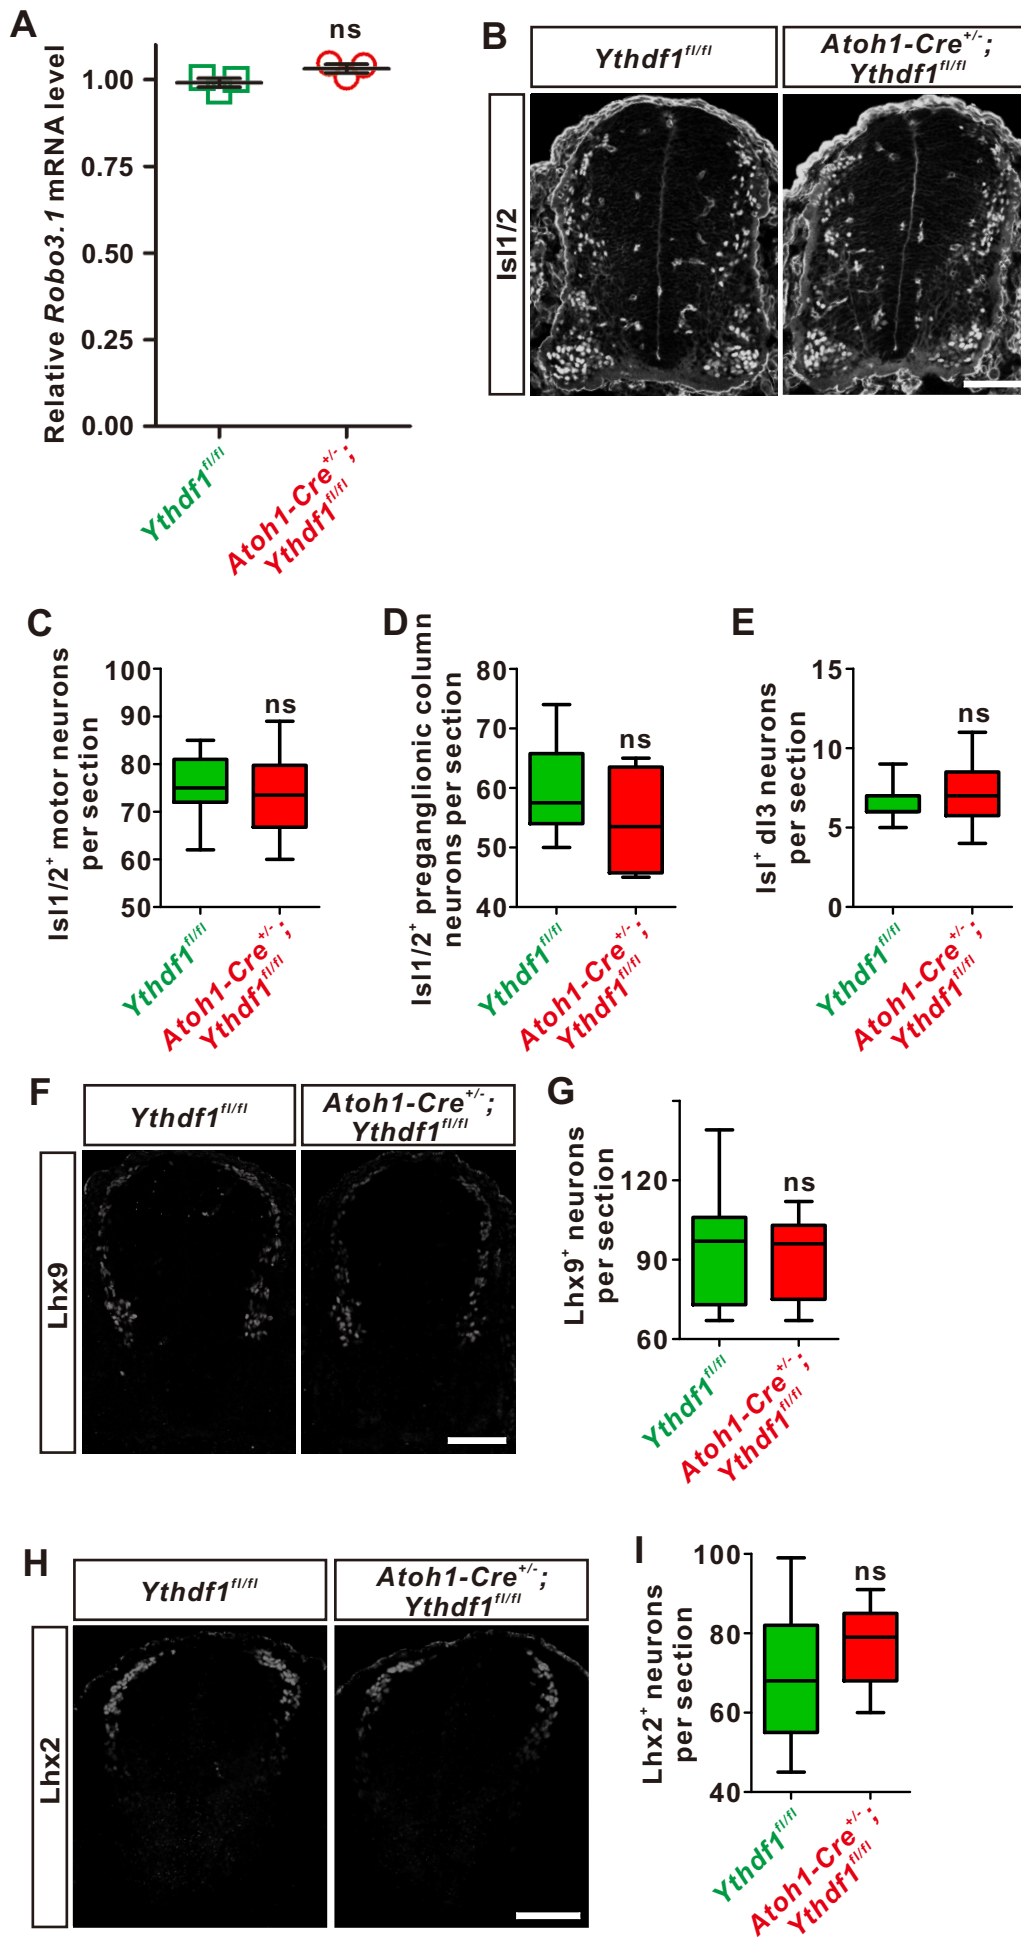

# Supplementary Figure S6

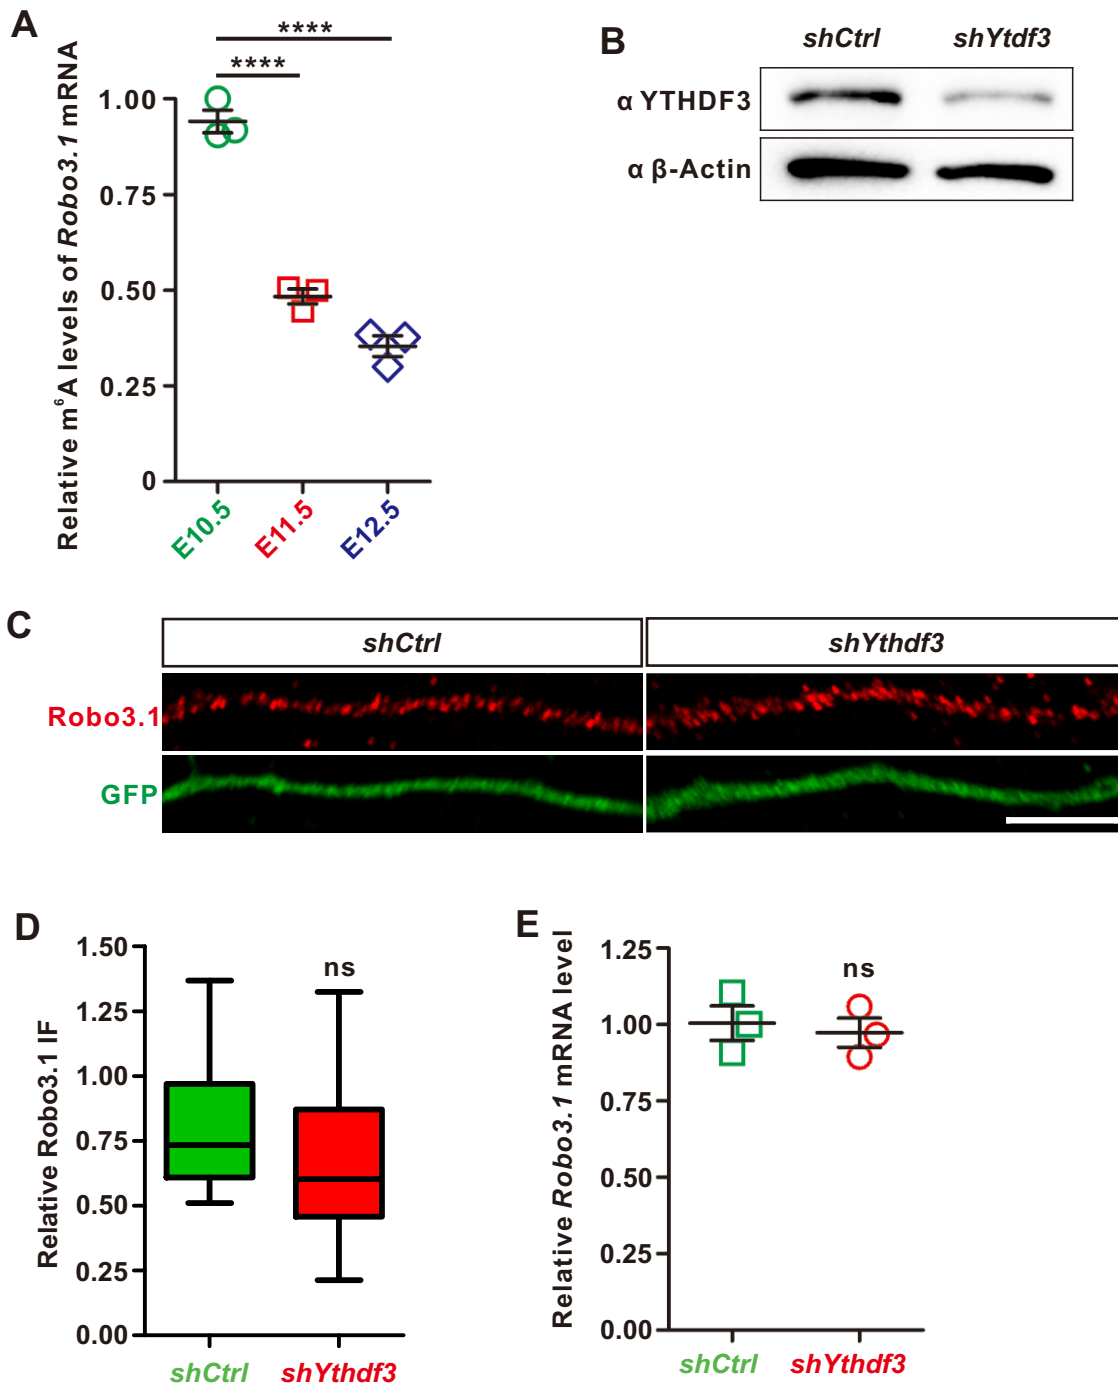

Supplement: gkz157_supplemental_file.pdf [file gkz157_supplemental_file.pdf]
